# Supplementary material for: Organic solar cells with plasmonic layers formed by laser nanofabrication
Source: Royal Society of Chemistry journal article supplement (doi:10.1039/c3cp51334c), 2013-01-01
Supplement: c3cp51334c.pdf [file c3cp51334c.pdf]

## Supporting Information

# Organic Solar Cells with Plasmonic Layers Formed by Laser Nanofabrication

Michail J. Beliatis,<sup>a</sup> Simon J. Henley,<sup>a</sup> Seungjin Han,<sup>a</sup> Keyur Gandhi,<sup>a</sup> A. A. D. T. Adikaari<sup>a||</sup>,  
Emmanuel I. Stratakis,<sup>b</sup> Emmanuel Kymakis<sup>c</sup> and S. Ravi P. Silva<sup>a\*</sup>

<sup>a</sup> Nano-Electronics Centre, Advanced Technology Institute (ATI), University of Surrey, Guildford, GU2 7XH, United Kingdom.

Tel: +44 (0)1483 689825; E-mail: s.silva@surrey.ac.uk

<sup>b</sup> Institute of Electronic Structure and Laser (IESL), Foundation for Research and Technology-Hellas (FORTH), Heraklion, 71110 Crete, Greece

<sup>c</sup> Centre of Materials Technology & Photonics and Department of Electrical Engineering, Technological Educational Institute (TEI) of Crete, 71004 Crete, Greece

<sup>||</sup>Department of Energy & Climate Change, 3 Whitehall Place, London, SW1A 2AW, United Kingdom.

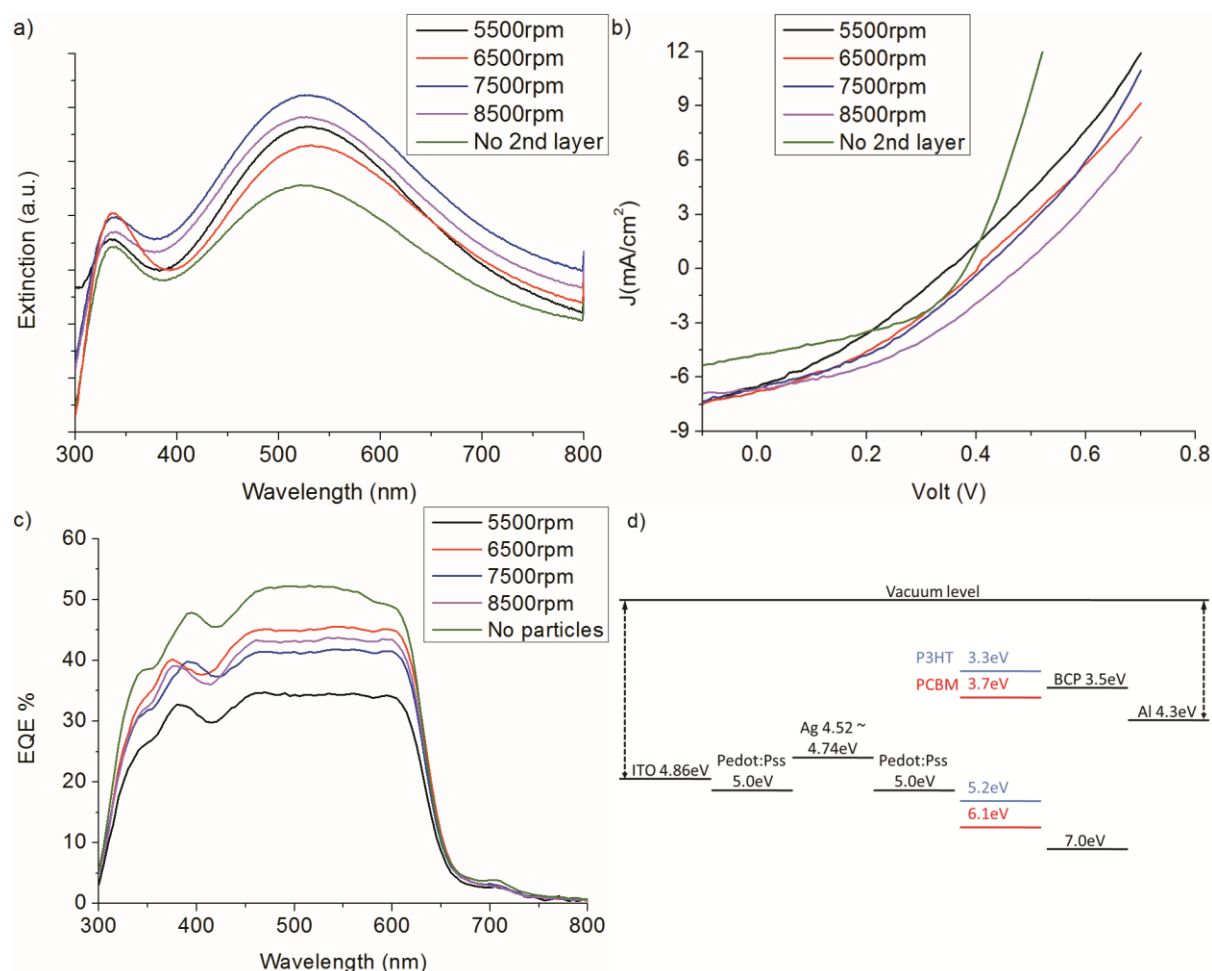

Figure S1 a) real measurements of extinction for all substrates with Ag nanoparticles, before the active layer deposition. b) J-V Curves under AM 1.5G at 1000W/m<sup>2</sup>, c) EQE characterization for all cells with different PEDOT:PSS layer thicknesses. Colours are representing results for substrates with the same spin speed for coating the second PEDOT:PSS layer at different

thicknesses, black for 5500rpm, red for 6500rpm, blue for 7500rpm, pink for 8500rpm and green for no second PEDOT:PSS layer (reference), and d) band alignment diagram for cells with silver nanoparticles in the front contact.

The lower efficiencies recorded for the Ag nanoparticles substrates can be attributed at two factors. First, the mismatched Fermi level of Ag 4.52-4.74eV compared to PEDOT:PSS 5.0eV and the HOMO level of P3HT 5.2eV which can cause a charge trapping area due to energy levels' misalignment (Figure S1 d). Secondly, the strong absorption of photons between wavelengths 400nm and 600nm (Figure S1 a) in the Ag particles results to reduced photons' flux in the active layer. The characteristic peak near 350nm observed on all absorption curves (Figure S1 a) it can be attributed to PEDOT:PSS.
